# Supplementary material for: A 3D carbon black disposable electrochemical sensor modified with reduced graphene oxide used for the sensitive determination of levofloxacin
Source: Royal Society of Chemistry journal article supplement (doi:10.1039/d2nj05338a), 2022-12-15
Supplement: d2nj05338a1.pdf [file d2nj05338a1.pdf]

## A 3D carbon black disposable electrochemical sensor modified with reduced graphene oxide used to the sensitive determination of levofloxacin

Thalles Pedrosa Lisboa<sup>a\*</sup>, Raylla Santos Oliveira<sup>a</sup>, Wallace Burger Veríssimo de Oliveira<sup>a</sup>, Cassiano Cunha de Souza<sup>a</sup>, Guilherme Figueira Alves<sup>a</sup>, Maria Auxiliadora Costa Matos<sup>a</sup>, and Renato Camargo Matos<sup>a</sup>

<sup>a</sup>*Departamento de Química, Universidade Federal de Juiz de Fora, 36026-900, Juiz de Fora-MG, Brazil*

*\*Corresponding author: [thallespl\\_jf@hotmail.com](mailto:thallespl_jf@hotmail.com)*

### Supplementary Material

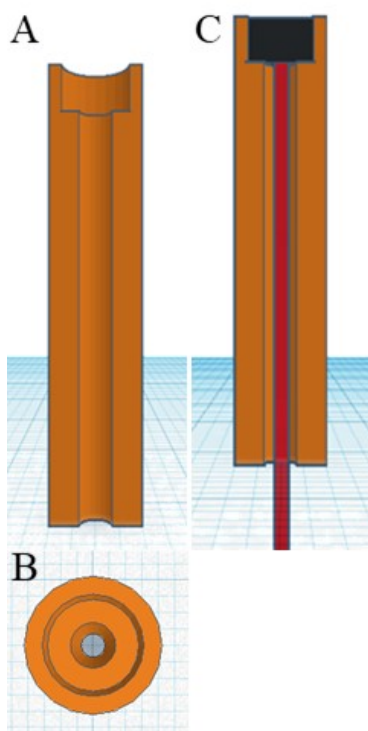

**Figure S1.** Schematic of the 3D-CB/PLA electrode construction showing (A) a side section with the concentric cylinder and the opening at one end; (B) top view of the support printed with the 3D printer with UV-curable acrylic resin; (C) side section of the sensor containing the 3D printed support and a copper wire in contact with the conductive CB/PLA material filled by hand with a 3D pen.

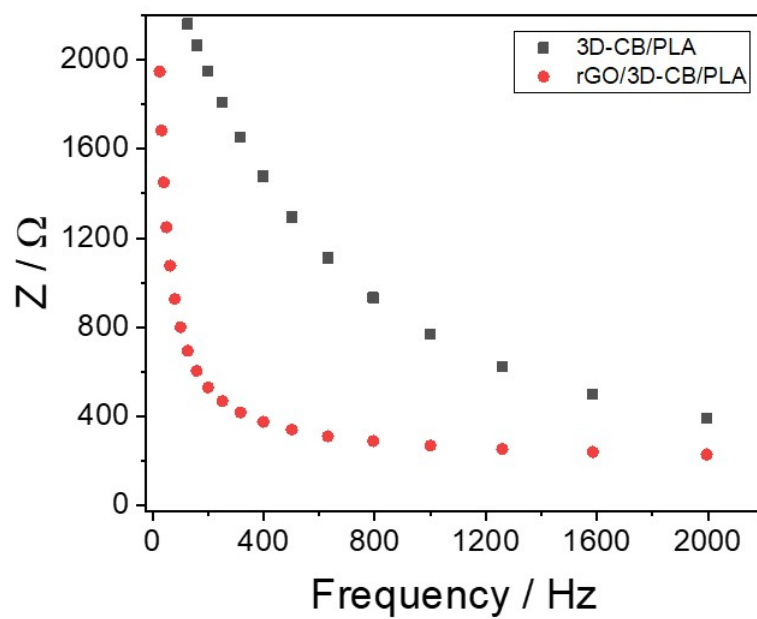

**Figure S2.** Impedance measurement results (Bode data) of 5 mmol L<sup>-1</sup> potassium ferricyanide in KCl medium 100 mmol L<sup>-1</sup> at +0.2 V (vs Ag/AgCl, KCl<sub>(sat)</sub>).

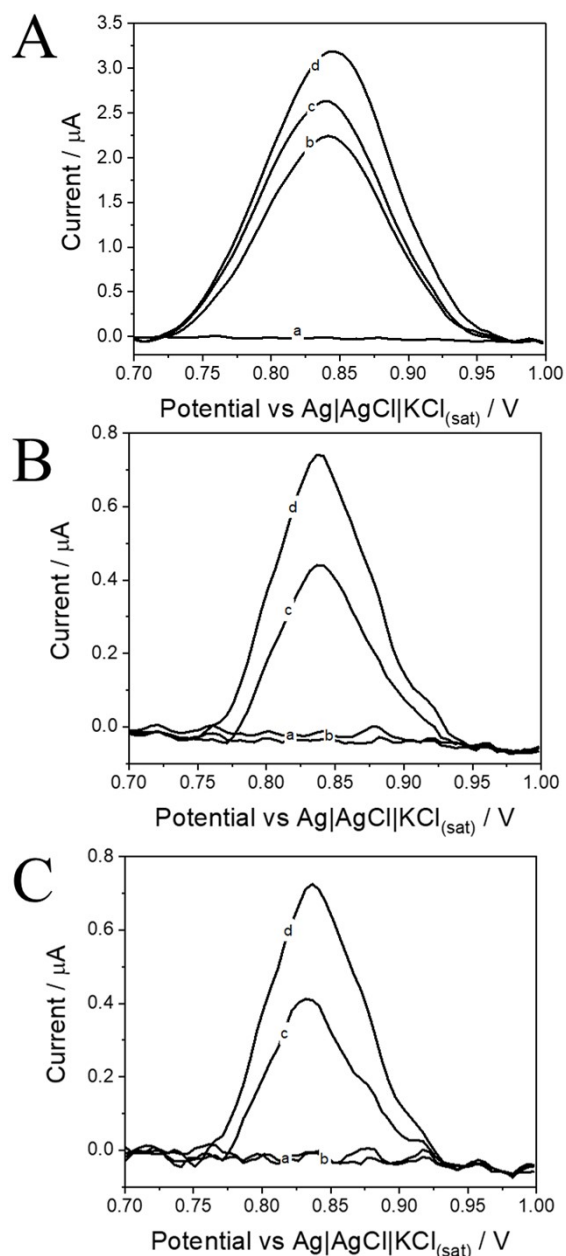

**Figure S3.** DPV voltammograms obtained for (A) pharmaceutical formulation sample (B) synthetic urine sample; and, (C) tap water sample. Where: (a) black, (b) sample, (c) spiked sample level 1 ( $25 \mu\text{mol L}^{-1}$ ), and, (d) spiked sample level 2 ( $35 \mu\text{mol L}^{-1}$ ). Conditions: reference electrode -  $\text{Ag}/\text{AgCl}$ ,  $\text{KCl}_{(\text{sat})}$ , supporting electrolyte BR buffer ( $10 \text{ mmol L}^{-1}$ , pH 6.0), pulse amplitude 90 mV, step potential 5 mV.
